# Supplementary material for: The Rescue of miR-148a Expression in Pancreatic Cancer: An Inappropriate Therapeutic Tool
Source: PubMed Central journal article supplement (PMC3561221; doi:10.1371/journal.pone.0055513), 2013-01-31
Supplement: pone.0055513.s001.pdf [file pone.0055513.s001.pdf]

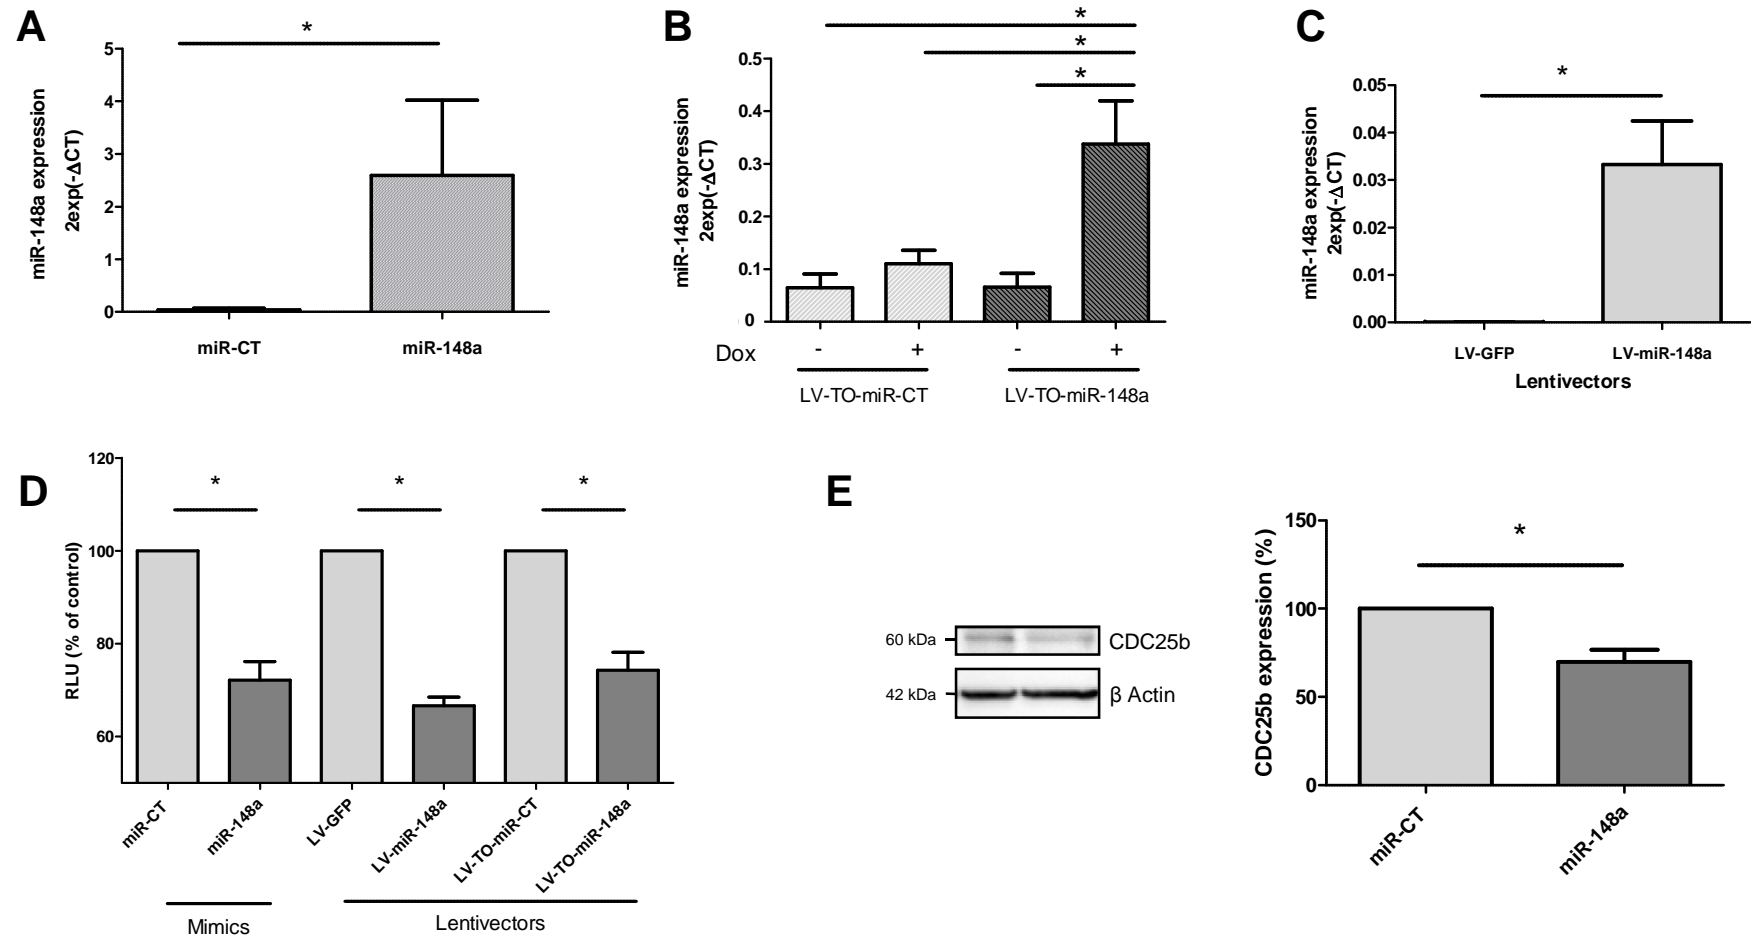

**Supplementary Figure 1. Functionality of miR-148a over-expressing tools.** MiR-148a expression level was measured by qRT-PCR following : **(A)** transient transfection in Capan-2 cells using a miR-148a precursor oligonucleotide or a control oligonucleotide, **(B)** stable transduction of MIA PaCA-2 cells using LV-TO-miR-148a or LV-TO-CT or **(C)** stable transduction of MIA PaCA-2 cells using LV-miR-148a or LV-GFP. **(D)** To determine whether the miR-148a encoded by our different tools is properly processed and functional, the targeting of CDC25b 3'-UTR is measured using a luciferase reporter construct as described by Liffers *et al.*. Results are expressed as percentage of luciferase signal compared to control cells. **(E)** The expression of *cdc25b* protein was assessed by Western blot after transient over-expression of miR-148a in IMIM-PC2 PDAC cells as described by Liffers *et al.*. The graph represents the quantification of three independent Western blot experiments. Results are expressed as percentage of CDC25b protein expression compared to miR-CT transfected cells.
