# Supplementary material for: The Rescue of miR-148a Expression in Pancreatic Cancer: An Inappropriate Therapeutic Tool
Source: PubMed Central journal article supplement (PMC3561221; doi:10.1371/journal.pone.0055513), 2013-01-31
Supplement: pone.0055513.s003.pdf [file pone.0055513.s003.pdf]

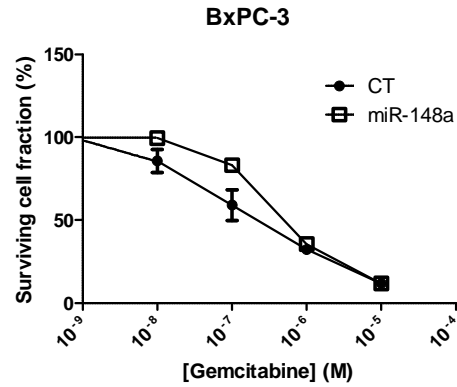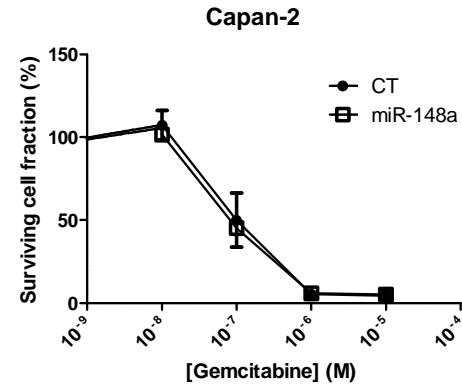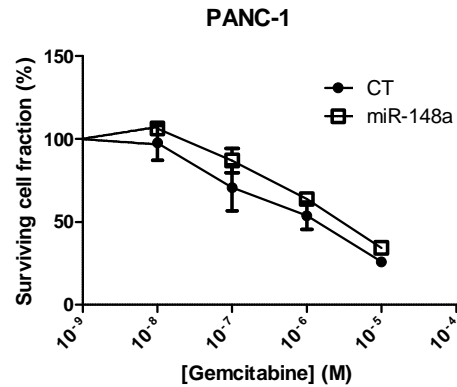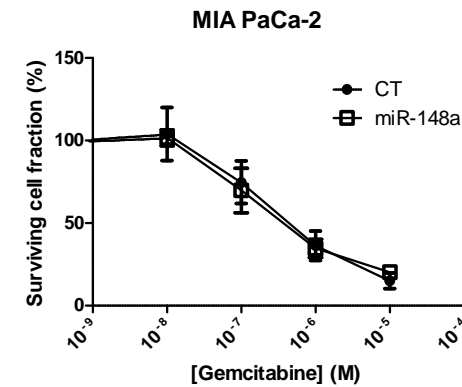

**Supplementary Figure 3. Gemcitabine sensitivity of PDAC cell lines.** One thousand of exponentially growing PDAC cells transiently over-expressing miR-148a or a control microRNA (miR-CT) were plated in 96 well plate. Cells were treated with different doses of gemcitabine ranging from  $10^{-9}$  M to  $10^{-4}$  M for 72h. For each cell line, cell viability was assessed by colorimetric method, compared to viability measured in  $10^{-9}$ M treated wells and represented as percentage of surviving cells.
