# Supplementary material for: The Rescue of miR-148a Expression in Pancreatic Cancer: An Inappropriate Therapeutic Tool
Source: PubMed Central journal article supplement (PMC3561221; doi:10.1371/journal.pone.0055513), 2013-01-31
Supplement: pone.0055513.s005.pdf [file pone.0055513.s005.pdf]

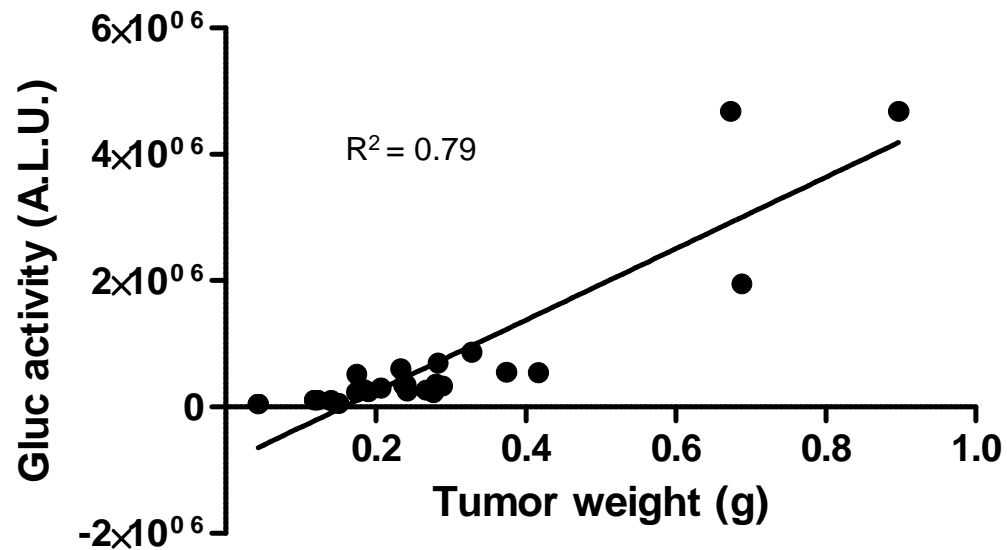

**Supplementary Figure 5. Correlation analysis between Gluc serum content and tumor weight.** Orthotopic MIA PaCa-2-Gluc cell xenografts were performed in SCID mice as described in Materials and Methods section (n=24). Thirty three days after injection, tumors were removed, scaled and 100  $\mu$ l of blood was sampled with 10  $\mu$ l of a 20% EDTA solution. Serum was isolated and Gluc content was assessed as described in Materials and Methods section. A regressive linear correlation was calculated to assess the correspondence between Gluc serum level and tumor weight and displayed a  $R^2=0.79$ .
