# Supplementary material for: The Rescue of miR-148a Expression in Pancreatic Cancer: An Inappropriate Therapeutic Tool
Source: PubMed Central journal article supplement (PMC3561221; doi:10.1371/journal.pone.0055513), 2013-01-31
Supplement: pone.0055513.s007.pdf [file pone.0055513.s007.pdf]

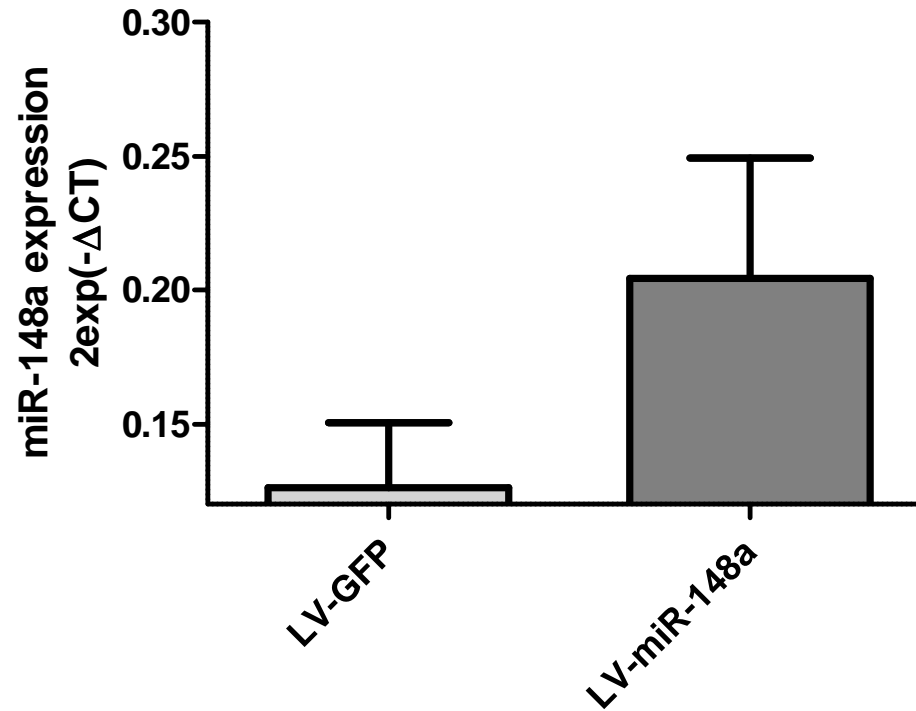

**Supplementary Figure 7. MiR-148a expression after *in vivo* tumor transduction of MIA PaCa-2 tumors.** Orthotopic tumors were established in SCID CB17 mice pancreas by injection of  $12 \times 10^6$  of exponentially growing MIA PaCa-2-Gluc and were injected with lentiviral particles encoding miR-148a or the GFP reporter protein (as described in Materials and Methods section). After removal, whole tumors were homogenized in TRIzol Reagent. Total RNAs were extracted and miR-148a expression was determined by qRT-PCR using specific primers directed against mature miR-148a and U6 RNA used for normalization. Relative amounts of miRNA were calculated by the comparative threshold cycle (CT) method.
